# Supplementary material for: Autologous and micro-fragmented adipose tissue for the treatment of diffuse degenerative knee osteoarthritis
Source: PubMed Central journal article supplement (PMC5626678; doi:10.1186/s40634-017-0108-2), 2017-10-03
Supplement: 40634_2017_108_MOESM2_ESM.pdf [file 40634_2017_108_MOESM2_ESM.pdf]

**Additional file 2: Table S2** Correlations between clinical outcomes and specific patient categories

|                  | Obs | TEG      | VAS       | IKDC     | KOOS_s   | KOOS_p   | KOOS_adl | KOOS_sport | KOOS_QoL | KOOS_tot |
|------------------|-----|----------|-----------|----------|----------|----------|----------|------------|----------|----------|
| <b>FC</b>        |     |          |           |          |          |          |          |            |          |          |
| NO               | 8   | 32.80556 | -29.91071 | 24.33036 | 20.78776 | 7.561116 | 13.59352 | 91.07143   | 25       | 18.99374 |
| YES              | 22  | 67.74621 | -48.53801 | 62.08398 | 41.4286  | 54.57629 | 27.07336 | 52.72727   | 73.21429 | 47.36633 |
| <i>P value</i>   |     | 0.4530   | 0.0746    | 0.0913   | 0.3850   | 0.0785   | 0.2225   | 0.7392     | 0.1782   | 0.1594   |
| <b>TP</b>        |     |          |           |          |          |          |          |            |          |          |
| NO               | 13  | 38.46154 | -32.25806 | 30.80357 | 5.260831 | 17.85806 | 14.82181 | 45.45454   | 20       | 20.69444 |
| YES              | 17  | 95       | -44.44444 | 66.80498 | 47.31892 | 44.9964  | 30.61338 | 60         | 75       | 42.29885 |
| <i>P value</i>   |     | 0.0687   | 0.7855    | 0.1373   | 0.0514   | 0.9166   | 0.3792   | 0.8485     | 0.6129   | 0.6009   |
| <b>PF</b>        |     |          |           |          |          |          |          |            |          |          |
| NO               | 9   | 70.90909 | -28.57143 | 41.20983 | 5.260831 | 17.85806 | 9.83168  | 45.45454   | 16.66667 | 16.80791 |
| YES              | 21  | 55.55556 | -44.44444 | 66.80498 | 47.31892 | 52.63357 | 41.66312 | 60         | 75       | 53.72425 |
| <i>P value</i>   |     | 0.3535   | 0.5411    | 0.2133   | 0.0249   | 0.2977   | 0.1816   | 0.9634     | 0.1787   | 0.1819   |
| <b>COMPART.</b>  |     |          |           |          |          |          |          |            |          |          |
| 1                | 12  | 40.23077 | -29.91071 | 30.74269 | 5.260831 | 14.60503 | 8.323351 | 26.2987    | 8.678557 | 12.65497 |
| 2+               | 18  | 92.17914 | -49.1453  | 83.04348 | 47.34057 | 65.75051 | 50.54766 | 80         | 100      | 57.64502 |
| <i>P value</i>   |     | 0.2041   | 0.1440    | 0.0067   | 0.0148   | 0.0943   | 0.0177   | 0.8300     | 0.0348   | 0.0223   |
| <b>FC</b>        |     |          |           |          |          |          |          |            |          |          |
| I-II             | 9   | 93.18182 | -53.84615 | 63.48195 | 39.9972  | 83.34    | 51.10305 | 45.45454   | 71.42857 | 56.26477 |
| III-IV           | 13  | 60.86956 | -44.44444 | 41.20983 | 42.86    | 44.9964  | 19.55654 | 60         | 75       | 30.17945 |
| <i>P value</i>   |     | 0.2705   | 0.3851    | 0.2426   | 0.7891   | 0.4225   | 0.2852   | 0.6855     | 0.4210   | 0.3006   |
| <b>TP</b>        |     |          |           |          |          |          |          |            |          |          |
| I-II             | 7   | 117.3913 | -53.84615 | 60.68602 | 39.9972  | 52.63357 | 30.61338 | 0          | 50       | 41.0084  |
| III-IV           | 10  | 60.06945 | -44.09722 | 70.06916 | 47.34057 | 37.491   | 34.93793 | 216.6667   | 100      | 48.01155 |
| <i>P value</i>   |     | 0.5582   | 0.5579    | 1.0000   | 0.3798   | 1.0000   | 0.6256   | 0.0753     | 0.4929   | 0.5582   |
| <b>PF</b>        |     |          |           |          |          |          |          |            |          |          |
| I-II             | 10  | 74.36869 | -57.27273 | 63.7455  | 51.42813 | 66.49542 | 51.10305 | 254.1667   | 85.71429 | 62.86652 |
| III-IV           | 11  | 27.27273 | -37.93103 | 73.33334 | 47.31892 | 24.98875 | 23.53333 | 28.57143   | 75       | 30.17945 |
| <i>P value</i>   |     | 0.4386   | 0.0484    | 0.6221   | 0.3979   | 0.2748   | 0.3973   | 0.5703     | 0.2872   | 0.2908   |
| <b>ASS SURG</b>  |     |          |           |          |          |          |          |            |          |          |
| NO               | 6   | 117.0168 | -56.92308 | 100.6918 | 44.99883 | 88.24871 | 58.30651 | 10         | 85.71429 | 62.86652 |
| YES              | 24  | 58.21256 | -36.12903 | 51.0828  | 34.1203  | 21.42341 | 20.35758 | 80         | 50       | 28.669   |
| <i>P value</i>   |     | 0.2762   | 0.1693    | 0.5338   | 0.7753   | 0.1947   | 0.1136   | 0.3575     | 0.7940   | 0.3507   |
| <b>PREV SURG</b> |     |          |           |          |          |          |          |            |          |          |
| NO               | 15  | 60.86956 | -43.75    | 60.68602 | 36.66087 | 44.9964  | 28.21273 | 60         | 75       | 41.0084  |
| YES              | 15  | 70.90909 | -28.57143 | 48.83227 | 11.7773  | 17.85806 | 14.82181 | 45.45454   | 40       | 20.69444 |
| <i>P value</i>   |     | 0.9504   | 0.4066    | 0.5476   | 0.5198   | 0.2715   | 0.3612   | 0.9664     | 0.7382   | 0.4429   |

Data are expressed as median  $\Delta [(t_{12}-t_0)/t_0]*100$ . FC= femoral condyle; TP= tibial plateau; PF= patellofemoral; COMPART=affected compartments; ASS SURG= associated surgery; PREV SURG=previous surgery. TEG=tegnér lysholm knee; VAS=visual analogue scale; KOOS s=symptoms; KOOS p=pain; KOOS adl=activity daily living; KOOS spt=sport; KOOS QoL=quality of life; KOOS tot=total.  $P<0.05$  was considered statistically significant.
